# Supplementary material
Source: MDPI journal article supplement (https://www.mdpi.com/2076-3417/11/15/6778)
Supplement: s1 [file s1]

# Supplementary Materials: The Effect of Different Organic Foliar Fertilization on Physio-logical and Chemical Characters in Hop (*Humulus lupulus* L., cv Cascade) Leaves and Cones

Margherita Rodolfi <sup>1,\*</sup>, Lorenzo Barbanti <sup>2</sup>, Cristiana Giordano <sup>3</sup>, Massimiliano Rinaldi <sup>1</sup>, Andrea Fabbri <sup>1</sup>, Luca Pretti <sup>4</sup>, Riccardo Casolari <sup>1</sup>, Deborah Beghé <sup>1</sup>, Raffaella Petrucci <sup>3</sup> and Tommaso Ganino <sup>1,3</sup>

## 1. Supplementary Information

| Beginning and final date                               | Result | U.M    | Method                                             | LQ  |
|--------------------------------------------------------|--------|--------|----------------------------------------------------|-----|
| Structure                                              | 0,64   | %      | D.M. 13/09/99 GU SO n.248<br>21/10/1999 MET II.1   | 0,1 |
| Texture (U.S.D.A.)<br>17/02/20 -29/02/20               |        |        | D.M. 13/09/99 GU SO n.248<br>21/10/1999 MET II.6   |     |
| Coarse Sand (2,00-0,2mm)                               | 1,1    | %      |                                                    |     |
| Fine Sand (0,2-0,005)                                  | 12,9   | %      |                                                    |     |
| Coarse Slit (0,05-0,02mm)                              | 15,0   | %      |                                                    |     |
| Fine Slit (0,02-0,002)                                 | 35,0   | %      |                                                    |     |
| Clay                                                   | 36,0   | %      |                                                    |     |
| Total Nitrogen<br>17/02/20 -29/02/20                   | 2,0    | g/Kg   | D.M. 13/09/99 GU SO n.248<br>21/10/1999 MET XVIII  | 0,1 |
| Organic substance (Spriger-Klee)<br>17/02/20 -29/02/20 | 3,1    | %      | D.M. 13/09/99 GU SO n.248<br>21/10/1999 MET VII.2  | 0,1 |
| PHOSPHOROUS<br>17/02/20 -29/02/20                      |        |        | D.M. 13/09/99 GU SO n.248<br>21/10/1999 MET XV.3   |     |
| Assimilable Phosphorous (P)                            | 17,8   | mg/kg  |                                                    | 0,1 |
| Assimilable Phosphorous (P2O5)                         | 40,9   | mg/Kg  |                                                    | 0,1 |
| CATION EXCHANGE CAPACITY<br>17/02/20 -29/02/20         |        |        | D.M. 13/09/99 GU SO n.248<br>21/10/1999 MET XIII.4 |     |
| Exchangeable Calcium (Ca)                              | 5850   | mg/ Kg |                                                    | 0,1 |
| Exchangeable Magnesium (Mg)                            | 267    | mg/ Kg |                                                    | 0,1 |
| Exchangeable Potassium (K)                             | 382    | mg/ Kg |                                                    | 0,1 |

Figure S1 Soil analysis.

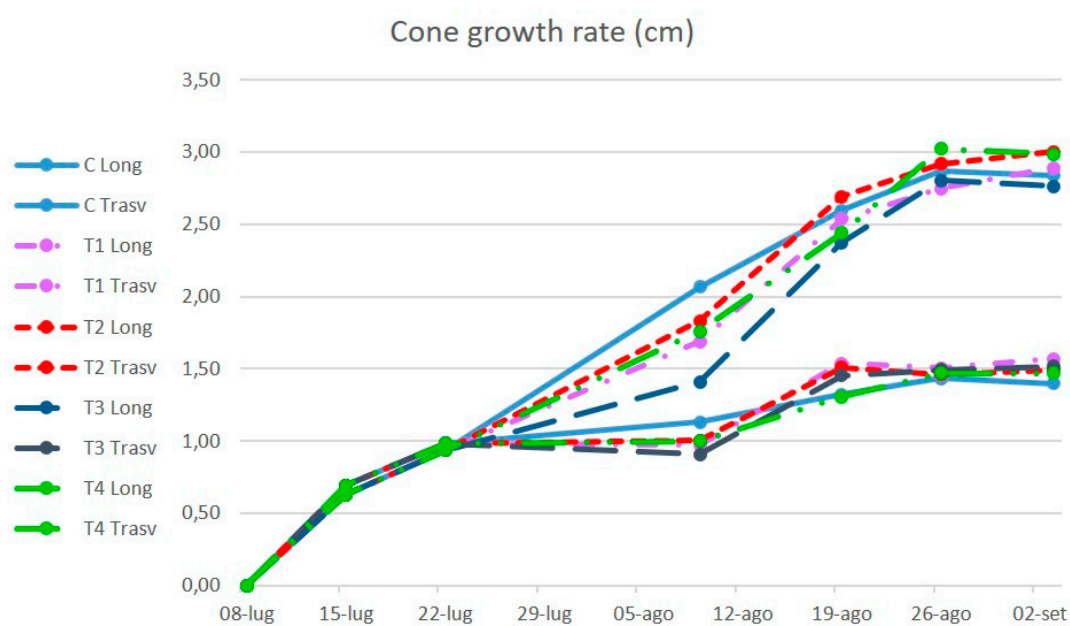

Figure S2. Longitudinal (Long) and transversal (Trasv) growth of the hop cones sampled in the different data acquisition time.
